# Supplementary material for: Dissolved Oxygen and Water Temperature Drive Vertical Spatiotemporal Variation of Phytoplankton Community: Evidence from the Largest Diversion Water Source Area
Source: MDPI journal article supplement (doi:10.3390/ijerph20054307), 2023-02-28
Supplement: s1 [file s1]

**Supplemental Table S1.** Location characteristics of sampling sites in the Danjiangkou Reservoir

| Sample    | Abbreviation | Maximum depth /(m) | Latitude | Longitude | Type                                        |
|-----------|--------------|--------------------|----------|-----------|---------------------------------------------|
| Heijizui  | H            | 48                 | 32°82′   | 111°53′   | Danku entry site                            |
| Songgang  | S            | 39                 | 32°77′   | 111°66′   | Wharf bay                                   |
| Kuxin     | K            | 48                 | 32°74′   | 111°57′   | Danku kuxin                                 |
| Qushou    | Q            | 32                 | 32°65′   | 111°68′   | Water diversion area of Middle Road project |
| Taizishan | T            | 48                 | 32°66′   | 111°52′   | Hubei and Henan border                      |
| Bashan    | B            | 65                 | 32°56′   | 111°48′   | Hanku body                                  |
| Langhekou | L            | 64                 | 32°59′   | 111°31′   | Han river entry site                        |

**Supplemental Table S2.** Proportion of species in the Danjiangkou Reservoir

| Phylum          | Family | Genus | Species | Proportion |
|-----------------|--------|-------|---------|------------|
| Chlorophyta     | 28     | 35    | 62      | 39.49%     |
| Bacillariophyta | 20     | 25    | 44      | 28.03%     |
| Cyanobacteria   | 11     | 13    | 21      | 13.38%     |
| Charophyta      | 1      | 2     | 3       | 1.91%      |
| Miozoa          | 4      | 4     | 8       | 5.10%      |
| Euglenozoa      | 2      | 3     | 7       | 4.46%      |
| Cryptophyta     | 2      | 2     | 6       | 3.82%      |
| Ochrophyta      | 3      | 3     | 5       | 3.18%      |
| Haptophyta      | 1      | 1     | 1       | 0.64%      |
| Total           | 72     | 88    | 157     | 100.00%    |

**Supplemental Table S3.** Test results of inter-subject effects of diversity indices in the Danjiangkou Reservoir

| Index           | Test value | Season | Layer  | Season*layer |
|-----------------|------------|--------|--------|--------------|
| Total abundance | F          | 9.455  | 26.588 | 4.333        |
|                 | <i>p</i>   | <0.001 | <0.001 | <0.001       |
| <i>S</i>        | F          | 34.633 | 30.864 | 1.091        |
|                 | <i>p</i>   | <0.001 | <0.001 | 0.361        |
| <i>H'</i>       | F          | 50.65  | 10.783 | 3.503        |
|                 | <i>p</i>   | <0.001 | <0.001 | <0.001       |

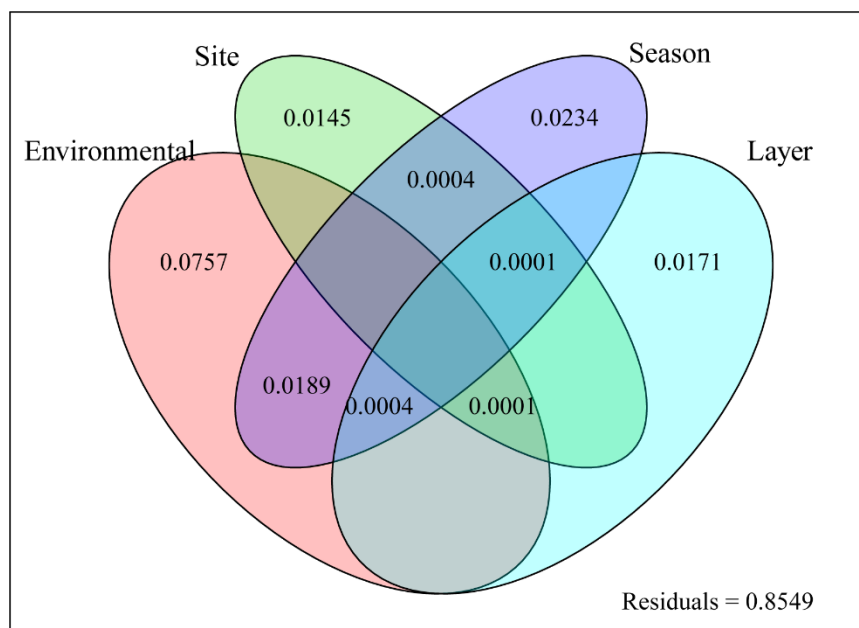

**Supplemental Figure S1.** Variation partitioning of phytoplankton community in the Danjiangkou Reservoir
